# Supplementary material for: Differences in the Effects of Anthocyanin Supplementation on Glucose and Lipid Metabolism According to the Structure of the Main Anthocyanin: A Meta-Analysis of Randomized Controlled Trials
Source: MDPI journal article supplement (doi:10.3390/nu13062003), 2021-06-10
Supplement: s1 [file s1]

**Table S1.** Subgroup analyses for effects of anthocyanins and main anthocyanin in the test foods on TG

| Subgroup                                         | Anthocyanin groups   | n                 | MD<br>[95% CI]          | I <sup>2</sup>          | p                          |                           |                          |      |
|--------------------------------------------------|----------------------|-------------------|-------------------------|-------------------------|----------------------------|---------------------------|--------------------------|------|
|                                                  |                      |                   |                         |                         | Heterogeneity <sup>a</sup> | Within-group <sup>b</sup> | Intra-group <sup>c</sup> |      |
| 1. Main anthocyanin to total anthocyanin content |                      |                   |                         |                         |                            |                           |                          |      |
| ≥ 50%                                            | Cyanidin-based       | 3                 | -0.02<br>[-0.36, 0.33]  | 13                      | 0.32                       | 0.93                      |                          |      |
|                                                  | Delphinidin-based    | 7                 | -0.16<br>[-0.32, 0.01]  | 0                       | 0.46                       | 0.06                      |                          |      |
|                                                  | Subtotal             | 10                | -0.13<br>[-0.27, 0.02]  | 0                       | 0.47                       | 0.09                      | 0.46                     |      |
|                                                  | < 50%                | Delphinidin-based | 2                       | -0.55<br>[-1.08, -0.02] | 80                         | 0.02                      | 0.04                     |      |
|                                                  |                      | Malvidin-based    | 2                       | -0.13<br>[-0.36, 0.10]  | 0                          | 0.50                      | 0.26                     |      |
|                                                  |                      | Subtotal          | 5                       | -0.33<br>[-0.56, -0.10] | 54                         | 0.07                      | 0.005                    | 0.36 |
| 2. Anthocyanin dosage                            |                      |                   |                         |                         |                            |                           |                          |      |
| ≥ 160 mg                                         | Delphinidin-based    | 5                 | -0.17<br>[-0.39, 0.05]  | 18                      | 0.30                       | 0.12                      |                          |      |
|                                                  | Malvidin-based       | 2                 | -0.13<br>[-0.36, 0.10]  | 0                       | 0.50                       | 0.26                      |                          |      |
|                                                  | Subtotal             | 8                 | -0.18<br>[-0.31, -0.04] | 0                       | 0.59                       | 0.01                      | 0.92                     |      |
|                                                  | < 160 mg             | Cyanidin-based    | 3                       | 0.13<br>[-0.25, 0.51]   | 0                          | 0.63                      | 0.52                     |      |
|                                                  |                      | Delphinidin-based | 4                       | -0.32<br>[-0.64, -0.00] | 64                         | 0.04                      | 0.05                     |      |
|                                                  |                      | Subtotal          | 7                       | -0.21<br>[-0.48, 0.06]  | 58                         | 0.03                      | 0.13                     | 0.08 |
| 3. Types of anthocyanin source                   |                      |                   |                         |                         |                            |                           |                          |      |
| Purified anthocyanins                            | Delphinidin-based    | 6                 | -0.15<br>[-0.34, 0.04]  | 10                      | 0.35                       | 0.11                      |                          |      |
|                                                  | Subtotal             | 6                 | -0.15<br>[-0.34, 0.04]  | 10                      | 0.35                       | 0.11                      | -                        |      |
|                                                  | Extract              | Cyanidin-based    | 4                       | -0.02<br>[-0.31, 0.27]  | 0                          | 0.51                      | 0.88                     |      |
|                                                  |                      | Delphinidin-based | 3                       | -0.41<br>[-0.78, -0.04] | 69                         | 0.04                      | 0.03                     |      |
|                                                  |                      | Subtotal          | 8                       | -0.22<br>[-0.42, -0.02] | 53                         | 0.04                      | 0.03                     | 0.26 |
|                                                  | 4. Target population |                   |                         |                         |                            |                           |                          |      |
| Prediabetes and/or type 2 diabetes               | Delphinidin-based    | 2                 | -0.19<br>[-0.67, 0.30]  | 73                      | 0.05                       | 0.45                      |                          |      |
|                                                  | Subtotal             | 3                 | -0.23<br>[-0.56, 0.10]  | 47                      | 0.15                       | 0.17                      | 0.72                     |      |
|                                                  | Dyslipidemia         | Delphinidin-based | 5                       | -0.27<br>[-0.55, 0.00]  | 58                         | 0.05                      | 0.05                     |      |
|                                                  |                      | Subtotal          | 5                       | -0.27<br>[-0.55, 0.00]  | 58                         | 0.05                      | 0.05                     | -    |
|                                                  | Metabolic syndrome   | Cyanidin-based    | 2                       | -0.20<br>[-0.60, 0.19]  | 0                          | 0.81                      | 0.31                     |      |
|                                                  |                      | Subtotal          | 2                       | -0.20<br>[-0.60, 0.19]  | 0                          | 0.81                      | 0.31                     | -    |
| Overweight or obesity                            | Cyanidin-based       | 2                 | 0.18<br>[-0.24, 0.60]   | 0                       | 0.44                       | 0.40                      |                          |      |
|                                                  | Subtotal             | 3                 | 0.08<br>[-0.24, 0.41]   | 0                       | 0.58                       | 0.62                      | 0.48                     |      |
| 5. Baseline TG                                   |                      |                   |                         |                         |                            |                           |                          |      |
| > 1.7 mmol/L                                     | Cyanidin-based       | 2                 | -0.17<br>[-0.88, 0.55]  | 0                       | 0.83                       | 0.65                      |                          |      |

|                          |                   |           |                                       |           |             |               |              |
|--------------------------|-------------------|-----------|---------------------------------------|-----------|-------------|---------------|--------------|
|                          | Delphinidin-based | 8         | -0.25<br>[-0.44, -0.07]               | 49        | 0.06        | 0.008         |              |
|                          | <b>Subtotal</b>   | <b>11</b> | <b>-0.27</b><br><b>[-0.42, -0.11]</b> | <b>28</b> | <b>0.18</b> | <b>0.0007</b> | <b>0.94</b>  |
|                          | Cyanidin-based    | 2         | 0.00<br>[-0.46, 0.47]                 | 53        | 0.15        | 0.98          |              |
|                          | <b>Subtotal</b>   | <b>4</b>  | <b>-0.06</b><br><b>[-0.24, 0.12]</b>  | <b>0</b>  | <b>0.50</b> | <b>0.51</b>   | <b>0.92</b>  |
| 6. Baseline BMI          |                   |           |                                       |           |             |               |              |
| ≥ 25.0 kg/m <sup>2</sup> | Cyanidin-based    | 4         | -0.02<br>[-0.31, 0.27]                | 0         | 0.51        | 0.88          |              |
|                          | Delphinidin-based | 3         | -0.39<br>[-0.92, 0.15]                | 68        | 0.04        | 0.16          |              |
|                          | <b>Subtotal</b>   | <b>8</b>  | <b>-0.23</b><br><b>[-0.50, 0.04]</b>  | <b>43</b> | <b>0.09</b> | <b>0.1</b>    | <b>0.410</b> |
| < 25.0 kg/m <sup>2</sup> | Delphinidin-based | 5         | -0.13<br>[-0.36, 0.10]                | 28        | 0.24        | 0.27          |              |
|                          | <b>Subtotal</b>   | <b>6</b>  | <b>-0.14</b><br><b>[-0.30, 0.03]</b>  | <b>13</b> | <b>0.33</b> | <b>0.1</b>    | <b>0.870</b> |

The probabilities are based on the Cochran's Q-test (a), test for overall effect of each anthocyanin group (b), and test for subgroup differences (c). If there was the data about subgroup numbers being one or less, analysis limited to that subgroup was omitted.

BMI, body mass index; CI, confidence interval; MD, mean difference; n, sample size; TG, triglyceride.
