# Supplementary material for: Differences in the Effects of Anthocyanin Supplementation on Glucose and Lipid Metabolism According to the Structure of the Main Anthocyanin: A Meta-Analysis of Randomized Controlled Trials
Source: MDPI journal article supplement (doi:10.3390/nu13062003), 2021-06-10
Supplement: s1 [file s1]

**Table S2.** Subgroup analyses for effects of anthocyanins and main anthocyanin in the test foods on TC

| Subgroup                                         | Anthocyanin groups | n                 | MD<br>[95% CI]         | I <sup>2</sup>          | p                          |                           |                          |        |
|--------------------------------------------------|--------------------|-------------------|------------------------|-------------------------|----------------------------|---------------------------|--------------------------|--------|
|                                                  |                    |                   |                        |                         | Heterogeneity <sup>a</sup> | Within-group <sup>b</sup> | Intra-group <sup>c</sup> |        |
| 1. Main anthocyanin to total anthocyanin content |                    |                   |                        |                         |                            |                           |                          |        |
| ≥ 50%                                            | Cyanidin-based     | 4                 | -0.24<br>[-0.53, 0.04] | 0                       | 0.44                       | 0.09                      |                          |        |
|                                                  | Delphinidin-based  | 10                | -0.08<br>[-0.21, 0.05] | 0                       | 0.99                       | 0.21                      |                          |        |
|                                                  | Subtotal           | 14                | -0.11<br>[-0.23, 0.01] | 0                       | 0.95                       | 0.07                      | 0.31                     |        |
|                                                  | < 50%              | Delphinidin-based | 2                      | -1.44<br>[-2.30, -0.58] | 86                         | 0.009                     | 0.001                    |        |
|                                                  |                    | Malvidin-based    | 4                      | 0.15<br>[-0.03, 0.32]   | 0                          | 0.44                      | 0.10                     |        |
|                                                  |                    | Subtotal          | 6                      | -0.41<br>[-1.12, 0.30]  | 95                         | < 0.00001                 | 0.25                     | 0.0004 |
| 2. Anthocyanin dosage                            |                    |                   |                        |                         |                            |                           |                          |        |
| ≥ 160 mg                                         | Cyanidin-based     | 2                 | -0.11<br>[-0.86, 0.65] | 55                      | 0.14                       | 0.78                      |                          |        |
|                                                  | Delphinidin-based  | 6                 | -0.11<br>[-0.27, 0.04] | 0                       | 0.94                       | 0.15                      |                          |        |
|                                                  | Malvidin-based     | 2                 | -0.09<br>[-0.42, 0.25] | 0                       | 0.77                       | 0.61                      |                          |        |
|                                                  | Subtotal           | 10                | -0.13<br>[-0.26, 0.01] | 0                       | 0.91                       | 0.07                      | 0.99                     |        |
|                                                  | < 160 mg           | Cyanidin-based    | 2                      | -0.23<br>[-0.64, 0.17]  | 0                          | 0.50                      | 0.26                     |        |
|                                                  |                    | Delphinidin-based | 6                      | -0.48<br>[-1.18, 0.22]  | 93                         | < 0.00001                 | 0.18                     |        |
|                                                  |                    | Malvidin-based    | 2                      | 0.24<br>[0.03, 0.44]    | 0                          | 0.96                      | 0.02                     |        |
|                                                  |                    | Subtotal          | 10                     | -0.28<br>[-0.73, 0.18]  | 92                         | < 0.00001                 | 0.23                     | 0.03   |
| 3. Types of anthocyanin source                   |                    |                   |                        |                         |                            |                           |                          |        |
| Purified anthocyanins                            | Delphinidin-based  | 7                 | -0.12<br>[-0.26, 0.03] | 0                       | 0.98                       | 0.12                      |                          |        |
|                                                  | Subtotal           | 7                 | -0.12<br>[-0.26, 0.03] | 0                       | 0.98                       | 0.12                      | -                        |        |
| Extract                                          | Cyanidin-based     | 4                 | -0.24<br>[-0.53, 0.04] | 0                       | 0.44                       | 0.09                      |                          |        |
|                                                  | Delphinidin-based  | 5                 | -0.55<br>[-1.40, 0.30] | 94                      | < 0.00001                  | 0.20                      |                          |        |
|                                                  | Malvidin-based     | 3                 | 0.16<br>[-0.04, 0.36]  | 20                      | 0.30                       | 0.13                      |                          |        |
|                                                  | Subtotal           | 12                | -0.24<br>[-0.64, 0.16] | 90                      | < 0.00001                  | 0.23                      | 0.03                     |        |
| 4. Target population                             |                    |                   |                        |                         |                            |                           |                          |        |
| Prediabetes and/or type 2 diabetes               | Delphinidin-based  | 2                 | -0.14<br>[-0.43, 0.15] | 0                       | 0.97                       | 0.33                      |                          |        |
|                                                  | Subtotal           | 3                 | -0.12<br>[-0.38, 0.14] | 0                       | 0.93                       | 0.37                      | 0.70                     |        |
| Dyslipidemia                                     | Delphinidin-based  | 6                 | -0.57<br>[-1.20, 0.07] | 92                      | < 0.00001                  | 0.08                      |                          |        |
|                                                  | Subtotal           | 6                 | -0.57<br>[-1.20, 0.07] | 92                      | < 0.00001                  | 0.08                      | -                        |        |
| Overweight or obesity                            | Cyanidin-based     | 2                 | -0.23<br>[-0.62, 0.17] | 0                       | 0.50                       | 0.26                      |                          |        |
|                                                  | Subtotal           | 3                 | -0.11<br>[-0.41, 0.18] | 0                       | 0.56                       | 0.45                      | 0.45                     |        |
| Healthy                                          | Delphinidin-based  | 2                 | 0.05<br>[-0.31, 0.41]  | 0                       | 0.79                       | 0.79                      |                          |        |

|                          |                   |           |                                      |           |                     |             |              |
|--------------------------|-------------------|-----------|--------------------------------------|-----------|---------------------|-------------|--------------|
|                          | Malvidin-based    | 3         | 0.16<br>[-0.04, 0.36]                | 16        | 0.30                | 0.13        |              |
|                          | <b>Subtotal</b>   | <b>6</b>  | <b>0.05</b><br><b>[-0.15, 0.24]</b>  | <b>36</b> | <b>0.17</b>         | <b>0.64</b> | <b>0.08</b>  |
| 5. Baseline TC           |                   |           |                                      |           |                     |             |              |
| > 5.17 mmol/L            | Delphinidin-based | 9         | -0.40<br>[-0.83, 0.03]               | 90        | < 0.00001           | 0.07        |              |
|                          | Malvidin-based    | 2         | 0.24<br>[ 0.03, 0.44]                | 0         | 0.96                | 0.02        |              |
|                          | <b>Subtotal</b>   | <b>12</b> | <b>-0.28</b><br><b>[-0.63, 0.07]</b> | <b>90</b> | <b>&lt; 0.00001</b> | <b>0.11</b> | <b>0.009</b> |
| ≤ 5.17 mmol/L            | Cyanidin-based    | 3         | -0.16<br>[-0.57, 0.24]               | 20        | 0.29                | 0.43        |              |
|                          | Delphinidin-based | 3         | -0.02<br>[-0.28, 0.25]               | 0         | 0.75                | 0.89        |              |
|                          | Malvidin-based    | 2         | -0.09<br>[-0.42, 0.25]               | 0         | 0.77                | 0.61        |              |
|                          | <b>Subtotal</b>   | <b>8</b>  | <b>-0.09</b><br><b>[-0.26, 0.09]</b> | <b>0</b>  | <b>0.80</b>         | <b>0.34</b> | <b>0.83</b>  |
| 6. Baseline BMI          |                   |           |                                      |           |                     |             |              |
| ≥ 25.0 kg/m <sup>2</sup> | Cyanidin-based    | 3         | -0.13<br>[-0.51, 0.24]               | 0         | 0.38                | 0.48        |              |
|                          | Delphinidin-based | 6         | -0.16<br>[-0.43, 0.12]               | 56        | 0.05                | 0.26        |              |
|                          | Malvidin-based    | 3         | 0.21<br>[ 0.02, 0.40]                | 0         | 0.75                | 0.03        |              |
|                          | <b>Subtotal</b>   | <b>12</b> | <b>-0.04</b><br><b>[-0.21, 0.14]</b> | <b>47</b> | <b>0.04</b>         | <b>0.70</b> | <b>0.06</b>  |
| < 25.0 kg/m <sup>2</sup> | Delphinidin-based | 6         | -0.14<br>[-0.32, 0.05]               | 0         | 0.96                | 0.14        |              |
|                          | <b>Subtotal</b>   | <b>8</b>  | <b>-0.17</b><br><b>[-0.32, 0.01]</b> | <b>0</b>  | <b>0.94</b>         | <b>0.03</b> | <b>0.56</b>  |

The probabilities are based on the Cochran's Q-test (a), test for overall effect of each anthocyanin group (b), and test for subgroup differences (c). If there was the data about subgroup numbers being one or less, analysis limited to that subgroup was omitted.

BMI, body mass index; CI, confidence interval; MD, mean difference; n, sample size; TC, total cholesterol.
