# Supplementary material for: Differences in the Effects of Anthocyanin Supplementation on Glucose and Lipid Metabolism According to the Structure of the Main Anthocyanin: A Meta-Analysis of Randomized Controlled Trials
Source: MDPI journal article supplement (doi:10.3390/nu13062003), 2021-06-10
Supplement: s1 [file s1]

**Table S3.** Subgroup analyses for effects of anthocyanins and main anthocyanin in the test foods on LDL-C

| Subgroup                                         | Anthocyanin groups | n                     | MD<br>[95% CI]                        | I <sup>2</sup>                        | p                                    |                           |                          |             |             |
|--------------------------------------------------|--------------------|-----------------------|---------------------------------------|---------------------------------------|--------------------------------------|---------------------------|--------------------------|-------------|-------------|
|                                                  |                    |                       |                                       |                                       | Heterogeneity <sup>a</sup>           | Within-group <sup>b</sup> | Intra-group <sup>c</sup> |             |             |
| 1. Main anthocyanin to total anthocyanin content |                    |                       |                                       |                                       |                                      |                           |                          |             |             |
| ≥ 50%                                            | Cyanidin-based     | 2                     | -0.24<br>[-0.58, 0.11]                | 13                                    | 0.28                                 | 0.18                      |                          |             |             |
|                                                  | Delphinidin-based  | 8                     | -0.24<br>[-0.34, -0.14]               | 0                                     | 0.64                                 | < 0.00001                 |                          |             |             |
|                                                  | <b>Subtotal</b>    | <b>10</b>             | <b>-0.24</b><br><b>[-0.33, -0.14]</b> | <b>0</b>                              | <b>0.71</b>                          | <b>&lt; 0.00001</b>       | <b>0.99</b>              |             |             |
|                                                  | < 50%              | Delphinidin-based     | 2                                     | -0.72<br>[-1.38, -0.04]               | 80                                   | 0.02                      | 0.03                     |             |             |
|                                                  |                    | Malvidin-based        | 4                                     | 0.05<br>[-0.12, 0.22]                 | 0                                    | 0.59                      | 0.58                     |             |             |
|                                                  |                    | <b>Subtotal</b>       | <b>7</b>                              | <b>-0.19</b><br><b>[-0.50, 0.13]</b>  | <b>77</b>                            | <b>0.0002</b>             | <b>0.24</b>              | <b>0.09</b> |             |
| 2. Anthocyanin dosage                            |                    |                       |                                       |                                       |                                      |                           |                          |             |             |
| ≥ 160 mg                                         | Delphinidin-based  | 6                     | -0.26<br>[-0.37, -0.16]               | 0                                     | 0.63                                 | < 0.00001                 |                          |             |             |
|                                                  | Malvidin-based     | 2                     | -0.09<br>[-0.41, 0.23]                | 0                                     | 0.35                                 | 0.60                      |                          |             |             |
|                                                  | <b>Subtotal</b>    | <b>8</b>              | <b>-0.25</b><br><b>[-0.35, -0.15]</b> | <b>0</b>                              | <b>0.62</b>                          | <b>&lt; 0.00001</b>       | <b>0.31</b>              |             |             |
|                                                  | < 160 mg           | Cyanidin-based        | 3                                     | -0.20<br>[-0.48, 0.09]                | 0                                    | 0.46                      | 0.17                     |             |             |
|                                                  |                    | Delphinidin-based     | 4                                     | -0.39<br>[-0.85, 0.07]                | 79                                   | 0.002                     | 0.10                     |             |             |
|                                                  |                    | Malvidin-based        | 2                                     | 0.10<br>[-0.10, 0.30]                 | 0                                    | 0.73                      | 0.33                     |             |             |
| <b>Subtotal</b>                                  |                    | <b>9</b>              | <b>-0.19</b><br><b>[-0.43, 0.06]</b>  | <b>70</b>                             | <b>0.0007</b>                        | <b>0.13</b>               | <b>0.07</b>              |             |             |
| 3. Types of anthocyanin source                   |                    |                       |                                       |                                       |                                      |                           |                          |             |             |
| Purified anthocyanins                            | Delphinidin-based  | 7                     | -0.25<br>[-0.35, -0.15]               | 0                                     | 0.63                                 | < 0.00001                 |                          |             |             |
|                                                  | <b>Subtotal</b>    | <b>7</b>              | <b>-0.25</b><br><b>[-0.35, -0.15]</b> | <b>0</b>                              | <b>0.63</b>                          | <b>&lt; 0.00001</b>       | <b>-</b>                 |             |             |
|                                                  | Extract            | Cyanidin-based        | 3                                     | -0.20<br>[-0.48, 0.09]                | 0                                    | 0.46                      | 0.17                     |             |             |
|                                                  |                    | Delphinidin-based     | 3                                     | -0.49<br>[-1.09, 0.10]                | 81                                   | 0.006                     | 0.10                     |             |             |
|                                                  |                    | Malvidin-based        | 3                                     | 0.04<br>[-0.14, 0.22]                 | 0                                    | 0.40                      | 0.66                     |             |             |
|                                                  |                    | <b>Subtotal</b>       | <b>9</b>                              | <b>-0.20</b><br><b>[-0.45, 0.05]</b>  | <b>70</b>                            | <b>0.0007</b>             | <b>0.11</b>              | <b>0.12</b> |             |
| 4. Target population                             |                    |                       |                                       |                                       |                                      |                           |                          |             |             |
| Prediabetes and/or type 2 diabetes               | Delphinidin-based  | 2                     | -0.23<br>[-0.41, -0.06]               | 0                                     | 0.65                                 | 0.009                     |                          |             |             |
|                                                  | <b>Subtotal</b>    | <b>3</b>              | <b>-0.19</b><br><b>[-0.39, 0.01]</b>  | <b>0</b>                              | <b>0.43</b>                          | <b>0.02</b>               | <b>0.22</b>              |             |             |
|                                                  | Dyslipidemia       | Delphinidin-based     | 6                                     | -0.36<br>[-0.60, -0.11]               | 66                                   | 0.01                      | 0.005                    |             |             |
|                                                  |                    | <b>Subtotal</b>       | <b>6</b>                              | <b>-0.36</b><br><b>[-0.60, -0.11]</b> | <b>66</b>                            | <b>0.01</b>               | <b>0.005</b>             | <b>-</b>    |             |
|                                                  |                    | Overweight or obesity | Cyanidin-based                        | 2                                     | -0.24<br>[-0.58, 0.11]               | 0                         | 0.28                     | 0.18        |             |
|                                                  |                    |                       | <b>Subtotal</b>                       | <b>3</b>                              | <b>-0.18</b><br><b>[-0.45, 0.09]</b> | <b>0</b>                  | <b>0.42</b>              | <b>0.20</b> | <b>0.46</b> |
| Healthy                                          | Malvidin-based     | 3                     | 0.04<br>[-0.14, 0.22]                 | 0                                     | 0.40                                 | 0.66                      |                          |             |             |
|                                                  | <b>Subtotal</b>    | <b>3</b>              | <b>0.04</b><br><b>[-0.14, 0.22]</b>   | <b>0</b>                              | <b>0.40</b>                          | <b>0.66</b>               | <b>-</b>                 |             |             |

#### 5. Baseline LDL-C

|              |                   |           |                                       |           |              |              |              |
|--------------|-------------------|-----------|---------------------------------------|-----------|--------------|--------------|--------------|
| > 3.6 mmol/L | Delphinidin-based | 4         | -0.35<br>[-0.81, 0.11]                | 80        | 0.002        | 0.13         |              |
|              | <b>Subtotal</b>   | <b>4</b>  | <b>-0.35</b><br><b>[-0.81, 0.11]</b>  | <b>80</b> | <b>0.002</b> | <b>0.13</b>  | -            |
| ≤ 3.6 mmol/L | Cyanidin-based    | 3         | -0.20<br>[-0.48, 0.09]                | 0         | 0.46         | 0.17         |              |
|              | Delphinidin-based | 6         | -0.27<br>[-0.38, 0.17]                | 0         | 0.59         | < 0.00001    |              |
|              | Malvidin-based    | 4         | 0.05<br>[-0.12, 0.22]                 | 0         | 0.59         | 0.58         |              |
|              | <b>Subtotal</b>   | <b>13</b> | <b>-0.16</b><br><b>[-0.27, -0.05]</b> | <b>30</b> | <b>0.14</b>  | <b>0.005</b> | <b>0.007</b> |

#### 6. Baseline BMI

|                          |                   |           |                                       |           |             |              |              |
|--------------------------|-------------------|-----------|---------------------------------------|-----------|-------------|--------------|--------------|
| ≥ 25.0 kg/m <sup>2</sup> | Cyanidin-based    | 3         | -0.20<br>[-0.48, 0.09]                | 0         | 0.46        | 0.17         |              |
|                          | Delphinidin-based | 4         | -0.29<br>[-0.43, -0.14]               | 0         | 0.36        | < 0.0001     |              |
|                          | Malvidin-based    | 3         | 0.10<br>[-0.08, 0.29]                 | 0         | 0.93        | 0.28         |              |
|                          | <b>Subtotal</b>   | <b>10</b> | <b>-0.12</b><br><b>[-0.27, 0.04]</b>  | <b>46</b> | <b>0.06</b> | <b>0.14</b>  | <b>0.005</b> |
| < 25.0 kg/m <sup>2</sup> | Delphinidin-based | 5         | -0.19<br>[-0.33, -0.05]               | 0         | 0.86        | 0.006        |              |
|                          | <b>Subtotal</b>   | <b>6</b>  | <b>-0.19</b><br><b>[-0.51, -0.07]</b> | <b>0</b>  | <b>0.93</b> | <b>0.004</b> | <b>0.98</b>  |

The probabilities are based on the Cochran's Q-test (a), test for overall effect of each anthocyanin group (b), and test for subgroup differences (c). If there was the data about subgroup numbers being one or less, analysis limited to that subgroup was omitted. BMI, body mass index; CI, confidence interval; MD, mean difference; n, sample size; LDL-C, low-density lipoprotein cholesterol.
