# Supplementary material for: Differences in the Effects of Anthocyanin Supplementation on Glucose and Lipid Metabolism According to the Structure of the Main Anthocyanin: A Meta-Analysis of Randomized Controlled Trials
Source: MDPI journal article supplement (doi:10.3390/nu13062003), 2021-06-10
Supplement: s1 [file s1]

**Table S4.** Subgroup analyses for effects of anthocyanins and main anthocyanin in the test foods on HDL-C

| Subgroup                                         | Anthocyanin groups    | n                 | MD<br>[95% CI]        | I <sup>2</sup>        | p                          |                           |                          |      |
|--------------------------------------------------|-----------------------|-------------------|-----------------------|-----------------------|----------------------------|---------------------------|--------------------------|------|
|                                                  |                       |                   |                       |                       | Heterogeneity <sup>a</sup> | Within-group <sup>b</sup> | Intra-group <sup>c</sup> |      |
| 1. Main anthocyanin to total anthocyanin content |                       |                   |                       |                       |                            |                           |                          |      |
| ≥ 50%                                            | Cyanidin-based        | 2                 | 0.01<br>[0.08, 0.09]  | 0                     | 0.82                       | 0.90                      |                          |      |
|                                                  | Delphinidin-based     | 8                 | 0.09<br>[0.02, 0.17]  | 72                    | 0.0009                     | 0.008                     |                          |      |
|                                                  | Subtotal              | 10                | 0.08<br>[0.01, 0.15]  | 73                    | 0.00001                    | 0.03                      | 0.13                     |      |
|                                                  | < 50%                 | Delphinidin-based | 2                     | 0.18<br>[-0.12, 0.48] | 93                         | 0.0002                    | 0.24                     |      |
|                                                  |                       | Malvidin-based    | 4                     | 0.08<br>[-0.01, 0.17] | 0                          | 0.41                      | 0.08                     |      |
|                                                  |                       | Subtotal          | 7                     | 0.10<br>[-0.03, 0.23] | 81                         | < 0.0001                  | 0.13                     | 0.49 |
| 2. Anthocyanin dosage                            |                       |                   |                       |                       |                            |                           |                          |      |
| ≥ 160 mg                                         | Delphinidin-based     | 6                 | 0.10<br>[0.02, 0.19]  | 77                    | 0.0006                     | 0.02                      |                          |      |
|                                                  | Malvidin-based        | 2                 | 0.09<br>[-0.09, 0.27] | 63                    | 0.10                       | 0.31                      |                          |      |
|                                                  | Subtotal              | 8                 | 0.10<br>[0.03, 0.18]  | 73                    | 0.0006                     | 0.008                     | 0.90                     |      |
|                                                  | < 160 mg              | Cyanidin-based    | 3                     | 0.00<br>[-0.07, 0.08] | 0                          | 0.97                      | 0.92                     |      |
|                                                  |                       | Delphinidin-based | 4                     | 0.12<br>[-0.06, 0.30] | 87                         | < 0.0001                  | 0.18                     |      |
|                                                  |                       | Malvidin-based    | 2                     | 0.05<br>[-0.11, 0.21] | 0                          | 1.00                      | 0.54                     |      |
| Subtotal                                         |                       | 9                 | 0.07<br>[-0.04, 0.18] | 80                    | < 0.00001                  | 0.21                      | 0.47                     |      |
| 3. Types of anthocyanin source                   |                       |                   |                       |                       |                            |                           |                          |      |
| Purified anthocyanins                            | Delphinidin-based     | 7                 | 0.10<br>[0.02, 0.18]  | 74                    | 0.0007                     | 0.01                      |                          |      |
|                                                  | Subtotal              | 7                 | 0.10<br>[0.02, 0.18]  | 74                    | 0.0007                     | 0.01                      | -                        |      |
|                                                  | Extract               | Cyanidin-based    | 3                     | 0.00<br>[-0.07, 0.08] | 0                          | 0.97                      | 0.92                     |      |
|                                                  |                       | Delphinidin-based | 3                     | 0.13<br>[-0.11, 0.37] | 89                         | 0.0001                    | 0.27                     |      |
|                                                  |                       | Malvidin-based    | 3                     | 0.02<br>[-0.09, 0.13] | 0                          | 0.91                      | 0.67                     |      |
|                                                  |                       | Subtotal          | 9                     | 0.06<br>[-0.05, 0.17] | 80                         | < 0.00001                 | 0.31                     | 0.59 |
| 4. Target population                             |                       |                   |                       |                       |                            |                           |                          |      |
| Prediabetes and/or type 2 diabetes               | Delphinidin-based     | 2                 | 0.11<br>[-0.13, 0.35] | 87                    | < 0.0001                   | 0.38                      |                          |      |
|                                                  | Subtotal              | 3                 | 0.13<br>[-0.03, 0.33] | 87                    | 0.0004                     | 0.11                      | 0.63                     |      |
|                                                  | Dyslipidemia          | Delphinidin-based | 6                     | 0.13<br>[0.02, 0.23]  | 81                         | < 0.0001                  | 0.02                     |      |
|                                                  |                       | Subtotal          | 6                     | 0.13<br>[0.02, 0.23]  | 81                         | < 0.0001                  | 0.02                     | -    |
|                                                  | Overweight or obesity | Cyanidin-based    | 2                     | 0.01<br>[0.08, 0.09]  | 0                          | 0.82                      | 0.90                     |      |
|                                                  |                       | Subtotal          | 3                     | 0.01<br>[-0.08, 0.10] | 0                          | 0.97                      | 0.87                     | 0.90 |
| Healthy                                          | Malvidin-based        | 3                 | 0.02<br>[-0.09, 0.13] | 0                     | 0.91                       | 0.67                      |                          |      |
|                                                  | Subtotal              | 3                 | 0.02<br>[-0.09, 0.13] | 0                     | 0.91                       | 0.67                      | -                        |      |

#### 5. Baseline HDL-C

|                   |                   |           |                                     |           |                |             |             |
|-------------------|-------------------|-----------|-------------------------------------|-----------|----------------|-------------|-------------|
| $\leq 1.4$ mmol/L | Cyanidin-based    | 2         | 0.01<br>[-0.07, 0.09]               | 0         | 0.91           | 0.87        |             |
|                   | Delphinidin-based | 5         | 0.13<br>[ 0.04, 0.21]               | 70        | 0.01           | 0.003       |             |
|                   | Malvidin-based    | 4         | 0.08<br>[-0.01, 0.17]               | 0         | 0.41           | 0.08        |             |
|                   | <b>Subtotal</b>   | <b>11</b> | <b>0.08</b><br><b>[0.02, 0.15]</b>  | <b>69</b> | <b>0.0004</b>  | <b>0.01</b> | <b>0.13</b> |
| > 1.4 mmol/L      | Delphinidin-based | 5         | 0.10<br>[-0.06, 0.26]               | 88        | < 0.00001      | 0.20        |             |
|                   | <b>Subtotal</b>   | <b>6</b>  | <b>0.09</b><br><b>[-0.06, 0.23]</b> | <b>86</b> | <b>0.00001</b> | <b>0.24</b> | <b>0.40</b> |

#### 6. Baseline BMI

|                               |                   |           |                                     |           |               |              |             |
|-------------------------------|-------------------|-----------|-------------------------------------|-----------|---------------|--------------|-------------|
| $\geq 25.0$ kg/m <sup>2</sup> | Cyanidin-based    | 3         | 0.00<br>[-0.07, 0.08]               | 0         | 0.97          | 0.92         |             |
|                               | Delphinidin-based | 4         | 0.10<br>[0.02, 0.17]                | 32        | 0.22          | 0.01         |             |
|                               | Malvidin-based    | 3         | 0.12<br>[0.01, 0.23]                | 0         | 0.51          | 0.03         |             |
|                               | <b>Subtotal</b>   | <b>10</b> | <b>0.07</b><br><b>[0.02, 0.12]</b>  | <b>22</b> | <b>0.24</b>   | <b>0.006</b> | <b>0.13</b> |
| < 25.0 kg/m <sup>2</sup>      | Delphinidin-based | 5         | 0.09<br>[-0.03, 0.20]               | 82        | 0.0002        | 0.16         |             |
|                               | <b>Subtotal</b>   | <b>6</b>  | <b>0.07</b><br><b>[-0.04, 0.18]</b> | <b>80</b> | <b>0.0001</b> | <b>0.19</b>  | <b>0.39</b> |

The probabilities are based on the Cochran's Q-test (a), test for overall effect of each anthocyanin group (b), and test for subgroup differences (c). If there was the data about subgroup numbers being one or less, analysis limited to that subgroup was omitted.

BMI, body mass index; CI, confidence interval; MD, mean difference; n, sample size; HDL-C, high-density lipoprotein cholesterol.
